# Supplementary material
Source: MDPI journal article supplement (https://www.mdpi.com/2624-8549/3/4/80)
Supplement: s1 [file s1]

# Analysis of local and global aromaticity in Si<sub>3</sub>C<sub>5</sub> and Si<sub>4</sub>C<sub>8</sub> Clusters. Aromatic species containing planar tetracoordinate carbon

Juan Torres-Vega,<sup>1</sup> Diego R. Alcoba,<sup>2,3</sup> Ofelia B. Oña,<sup>4</sup> Alejandro Vásquez-Espinal,<sup>5</sup> Rodrigo Báez-Grez,<sup>5</sup> Luis Lain,<sup>6</sup> Alicia Torre,<sup>6</sup> Victor Garcia\*<sup>7</sup> and William Tiznado\*<sup>5</sup>

- <sup>1</sup> Centro de Investigaciones Tecnológicas, Biomédicas y Medioambientales, Calle José Santos Chocano 199, Urb. San Joaquín, Callao, Perú.
- <sup>2</sup> Departamento de Física, Facultad de Ciencias Exactas y Naturales, Universidad de Buenos Aires, Ciudad Universitaria, 1428 Buenos Aires, Argentina.
- <sup>3</sup> Instituto de Física de Buenos Aires, Consejo Nacional de Investigaciones Científicas y Técnicas, Ciudad Universitaria, 1428 Buenos Aires, Argentina.
- <sup>4</sup> Instituto de Investigaciones Fisicoquímicas Teóricas y Aplicadas, Universidad Nacional de La Plata, CCT La Plata, Consejo Nacional de Investigaciones Científicas y Técnicas. Diag. 113 y 64 (S/N), Sucursal 4, CC 16, 1900 La Plata, Argentina.
- <sup>5</sup> Computational and Theoretical Chemistry Group, Departamento de Ciencias Químicas, Facultad de Ciencias Exactas, Universidad Andres Bello, República 498, Santiago, Chile.
- <sup>6</sup> Departamento de Química Física, Facultad de Ciencia y Tecnología, Universidad del País Vasco. Apdo. 644, E-48080 Bilbao, Spain.
- <sup>7</sup> Departamento Académico de Fisicoquímica - Facultad de Química e Ingeniería Química, Universidad Nacional Mayor de San Marcos, Lima, Perú.

## SUPPORTING INFORMATION

**Table S1.** Cartesian coordinates of the studied systems.

| Si <sub>3</sub> C <sub>5</sub>                |              |              |              | Si <sub>4</sub> C <sub>8</sub>             |              |              |              |
|-----------------------------------------------|--------------|--------------|--------------|--------------------------------------------|--------------|--------------|--------------|
|                                               |              |              |              | Si                                         | -2.992387000 | 1.783878000  | 0.000329000  |
|                                               |              |              |              | C                                          | -0.000002000 | 0.710356000  | 0.000006000  |
| Si                                            | 1.734453000  | 1.828109000  | -0.000355000 | C                                          | 1.345736000  | 1.182177000  | -0.000152000 |
| Si                                            | -2.939689000 | -0.000020000 | -0.001748000 | Si                                         | 2.992386000  | 1.783866000  | -0.000379000 |
| Si                                            | 1.734467000  | -1.828091000 | -0.001028000 | C                                          | -1.345745000 | 1.182169000  | 0.000168000  |
| C                                             | 1.001829000  | 0.000001000  | 0.000998000  | C                                          | 0.000002000  | -0.710352000 | 0.000139000  |
| C                                             | 0.114198000  | -1.169992000 | 0.000838000  | C                                          | -1.345733000 | -1.182180000 | 0.000298000  |
| C                                             | 0.114192000  | 1.169996000  | 0.001036000  | Si                                         | -2.992372000 | -1.783881000 | 0.000282000  |
| C                                             | -1.243078000 | -0.699136000 | 0.002667000  | C                                          | 2.217927000  | 0.000009000  | -0.000225000 |
| C                                             | -1.243084000 | 0.699137000  | 0.002657000  | C                                          | 1.345741000  | -1.182172000 | 0.000036000  |
|                                               |              |              |              | Si                                         | 2.992381000  | -1.783876000 | -0.000097000 |
|                                               |              |              |              | C                                          | -2.217932000 | -0.000001000 | 0.000331000  |
| Si <sub>2</sub> C <sub>5</sub> H <sub>2</sub> |              |              |              | C <sub>5</sub> H <sub>5</sub> <sup>-</sup> |              |              |              |
| C                                             | 1.159242000  | 0.511515000  | 0.001002000  | C                                          | -1.141441000 | 0.370987000  | 0.000000000  |
| C                                             | 0.691174000  | 1.852859000  | 0.000706000  | C                                          | 0.000000000  | 1.200061000  | 0.000000000  |
| Si                                            | 1.786054000  | -1.127046000 | 0.001912000  | C                                          | 1.141370000  | 0.370802000  | 0.000000000  |
| H                                             | 1.327680000  | 2.730150000  | 0.001179000  | C                                          | 0.705386000  | -0.970930000 | 0.000000000  |
| C                                             | 0.000066000  | -0.394592000 | 0.000315000  | C                                          | -0.705393000 | -0.970929000 | 0.000000000  |
| C                                             | -1.159826000 | 0.510530000  | -0.000862000 | H                                          | -2.174702000 | 0.707423000  | 0.000000000  |
| C                                             | -0.692922000 | 1.852281000  | -0.001424000 | H                                          | 0.000116000  | 2.286754000  | 0.000000000  |
| Si                                            | -1.785309000 | -1.128546000 | -0.000811000 | H                                          | 2.174960000  | 0.706057000  | 0.000000000  |

|                                             |              |              |              |   |              |              |             |
|---------------------------------------------|--------------|--------------|--------------|---|--------------|--------------|-------------|
| H                                           | -1.330169000 | 2.729036000  | -0.002410000 | H | 1.344113000  | -1.850112000 | 0.000000000 |
|                                             |              |              |              | H | -1.344020000 | -1.850070000 | 0.000000000 |
| C <sub>8</sub> H <sub>6</sub> <sup>2-</sup> |              |              |              |   |              |              |             |
| C                                           | 0.000000000  | 0.724045000  | 0.000000000  |   |              |              |             |
| C                                           | 1.366619000  | 1.166982000  | 0.000000000  |   |              |              |             |
| C                                           | -1.366619000 | 1.166982000  | 0.000000000  |   |              |              |             |
| C                                           | 0.000000000  | -0.724045000 | 0.000000000  |   |              |              |             |
| C                                           | -1.366619000 | -1.166982000 | 0.000000000  |   |              |              |             |
| C                                           | 2.185326000  | 0.000000000  | 0.000000000  |   |              |              |             |
| C                                           | 1.366619000  | -1.166982000 | 0.000000000  |   |              |              |             |
| C                                           | -2.185326000 | 0.000000000  | 0.000000000  |   |              |              |             |
| H                                           | 1.731600000  | 2.195531000  | 0.000000000  |   |              |              |             |
| H                                           | 3.278591000  | 0.000000000  | 0.000000000  |   |              |              |             |
| H                                           | 1.731600000  | -2.195531000 | 0.000000000  |   |              |              |             |
| H                                           | -1.731600000 | 2.195531000  | 0.000000000  |   |              |              |             |
| H                                           | -3.278591000 | 0.000000000  | 0.000000000  |   |              |              |             |
| H                                           | -1.731600000 | -2.195531000 | 0.000000000  |   |              |              |             |

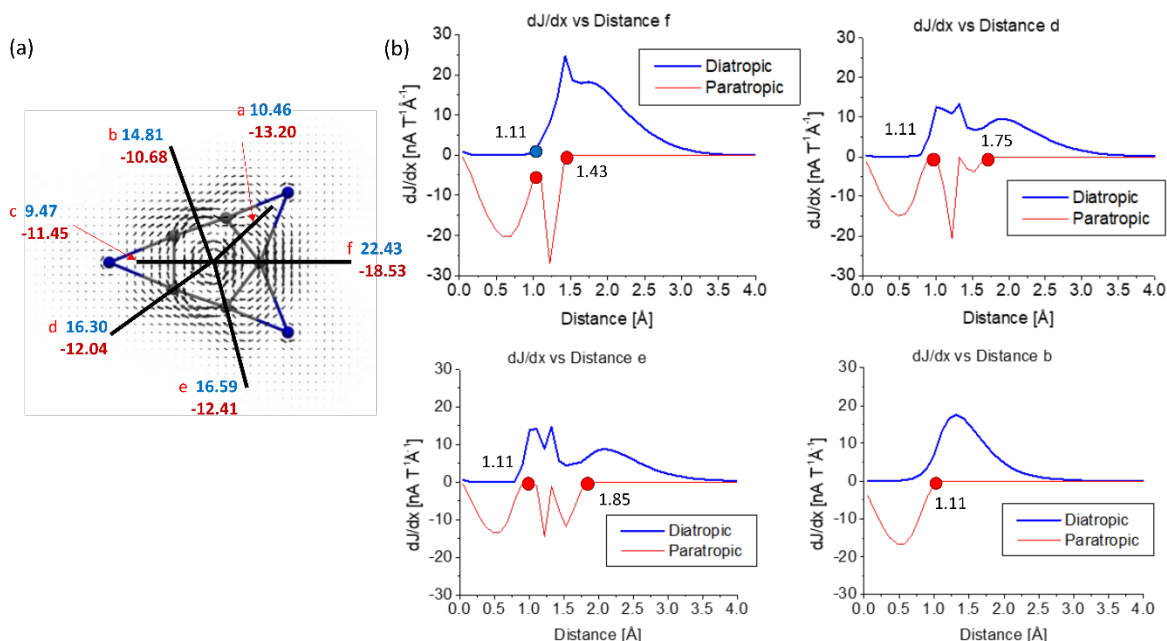

**Figure S1.** (a) Vector plot visualization of the current density of  $\text{Si}_3\text{C}_5$  in a plane placed  $0.5 \text{ \AA}$  above the molecular plane and top view of integration planes. (b) Integration profiles along the integration planes of  $\text{Si}_3\text{C}_5$ .

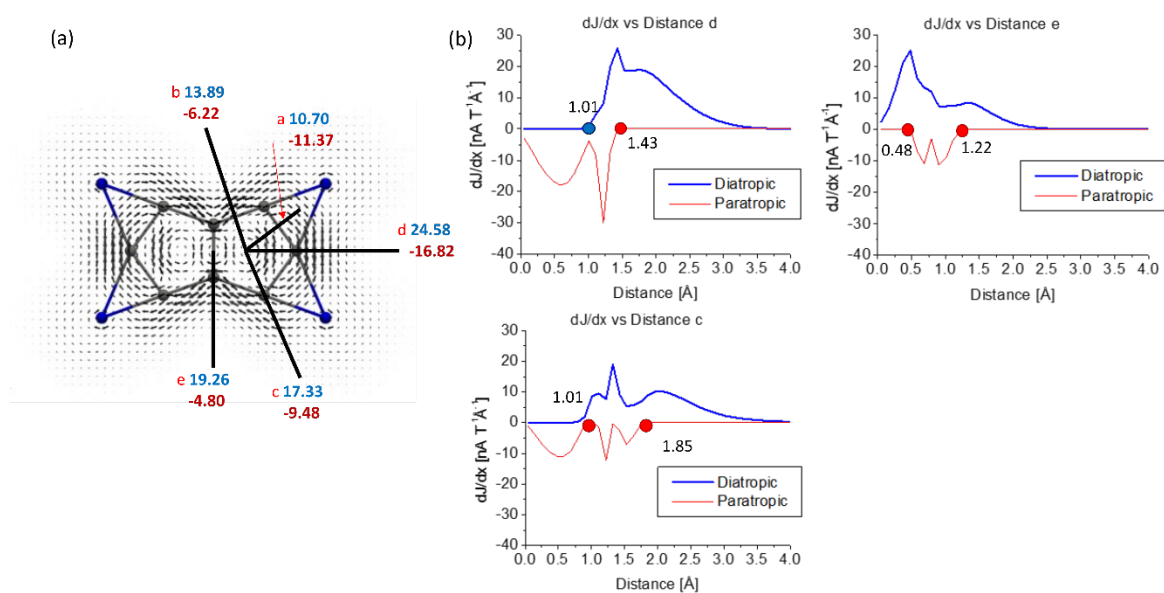

**Figure S2.** (a) Vector plot visualization of the current density of  $\text{Si}_4\text{C}_8$  in a plane placed  $0.5 \text{ \AA}$  above the molecular plane and top view of integration planes. (b) Integration profiles along the integration planes of  $\text{Si}_4\text{C}_8$ .

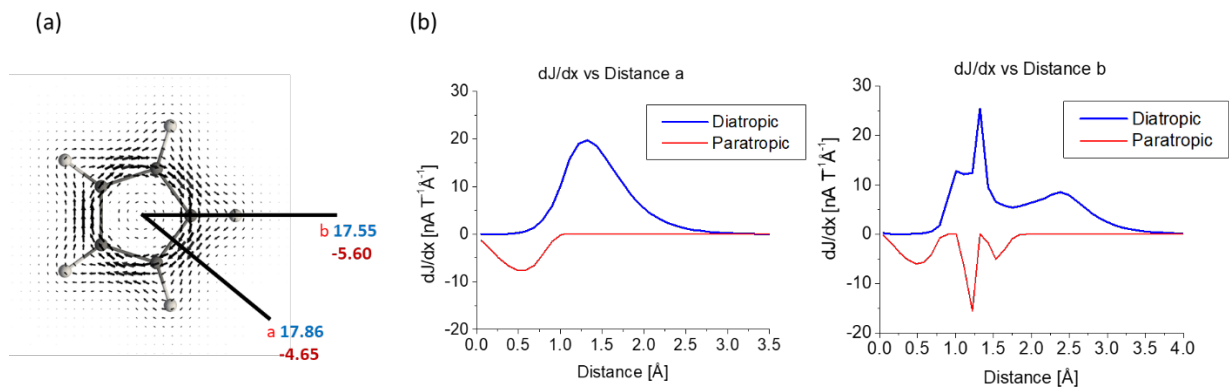

**Figure S3.** (a) Vector plot visualization of the current density of  $\text{CsH}_5^-$  in a plane placed  $0.5 \text{ \AA}$  above the molecular plane and top view of integration planes (RCS are also reported in  $\text{nA T}^{-1}$ ). (c) Integration profiles along the integration planes of  $\text{CsH}_5^-$ .

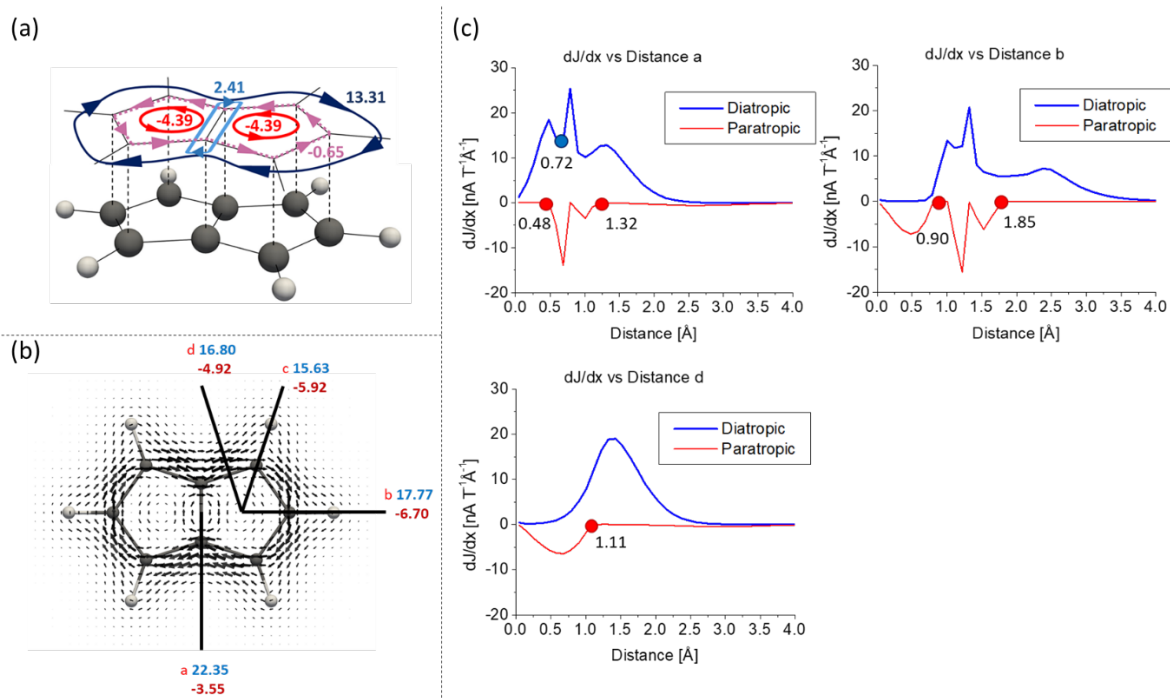

**Figure S4.** (a) Schematic representation of local and global currents. (b) Vector plot visualization of the current density of  $\text{CsH}_6^{2-}$  in a plane placed  $0.5 \text{ \AA}$  above the molecular plane and top view of integration planes. (c) Integration profiles along the integration planes of  $\text{CsH}_6^{2-}$ .

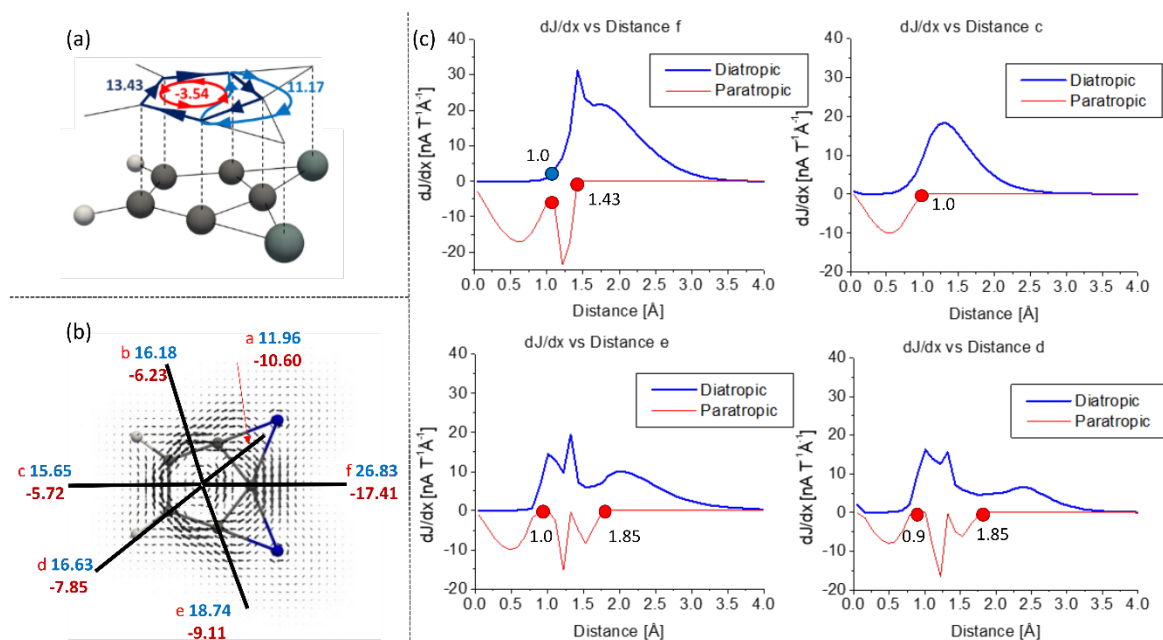

**Figure S5.** (a) Schematic representation of local and global currents. (b) Vector plot visualization of the current density of  $\text{Si}_2\text{C}_5\text{H}_2$  in a plane placed 0.5 Å above the molecular plane and top view of integration planes. (c) Integration profiles along the integration planes of  $\text{Si}_2\text{C}_5\text{H}_2$ .

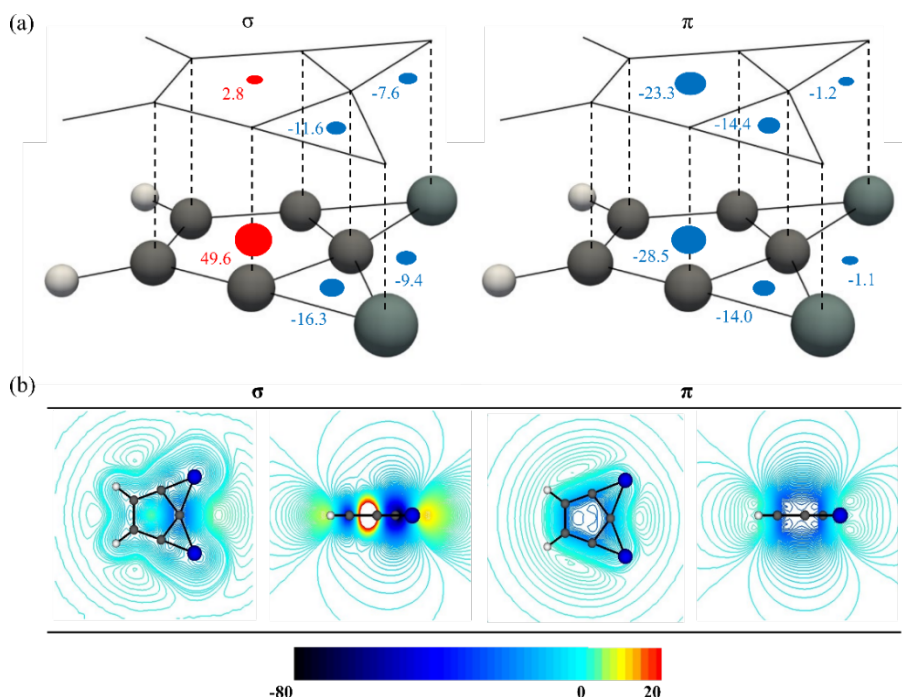

**Figure S6.** (a) Computed values (in ppm) of  $\sigma$ - and  $\pi$ -components (left and right sides) of  $\text{NICS}_{zz}$  at and above the ring centers (local and global) of  $\text{Si}_2\text{C}_5\text{H}_2$  (at the GIAO-B3LYP/6-311+G\*\*// B3LYP/6-311+G\* level). The blue/red dots denote diatropic/paratropic character, and the dot size is in line with the  $\text{NICS}_{zz}$  magnitude. (b) Isolines of the  $\sigma$ - and  $\pi$ -components of  $\text{NICS}_{zz}$  for  $\text{Si}_2\text{C}_5\text{H}_2$  (at the GIAO-B3LYP/6-311+G\*\*// B3LYP/6-311+G\* level). The isolines are plotted in both the molecular plane (left) and a plane perpendicular to the molecular plane (right). The color scale at the bottom is in ppm.

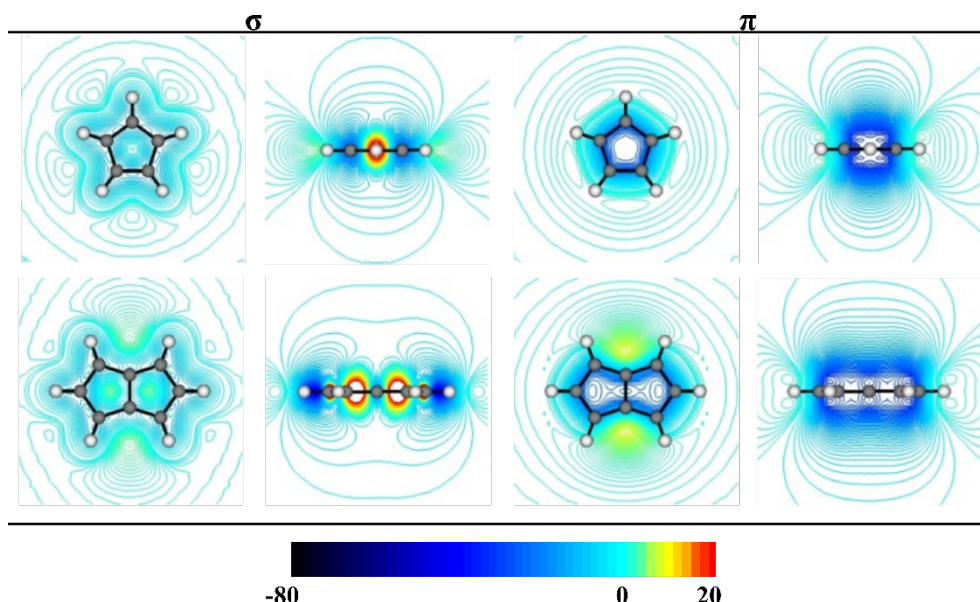

**Figure S7.** Isolines of the  $\sigma$ - and  $\pi$ -components of NICS<sub>zz</sub> for both the cyclopentadienyl anion ( $C_5H_5^-$ ) and the pentalene dianion ( $C_8H_6^{2-}$ ) (at the GIAO-B3LYP/6-311+G\*\*// B3LYP/6-311+G\* level). The isolines are plotted in both the molecular plane (left) and a plane perpendicular to the molecular plane (right). The color scale at the bottom is in ppm.

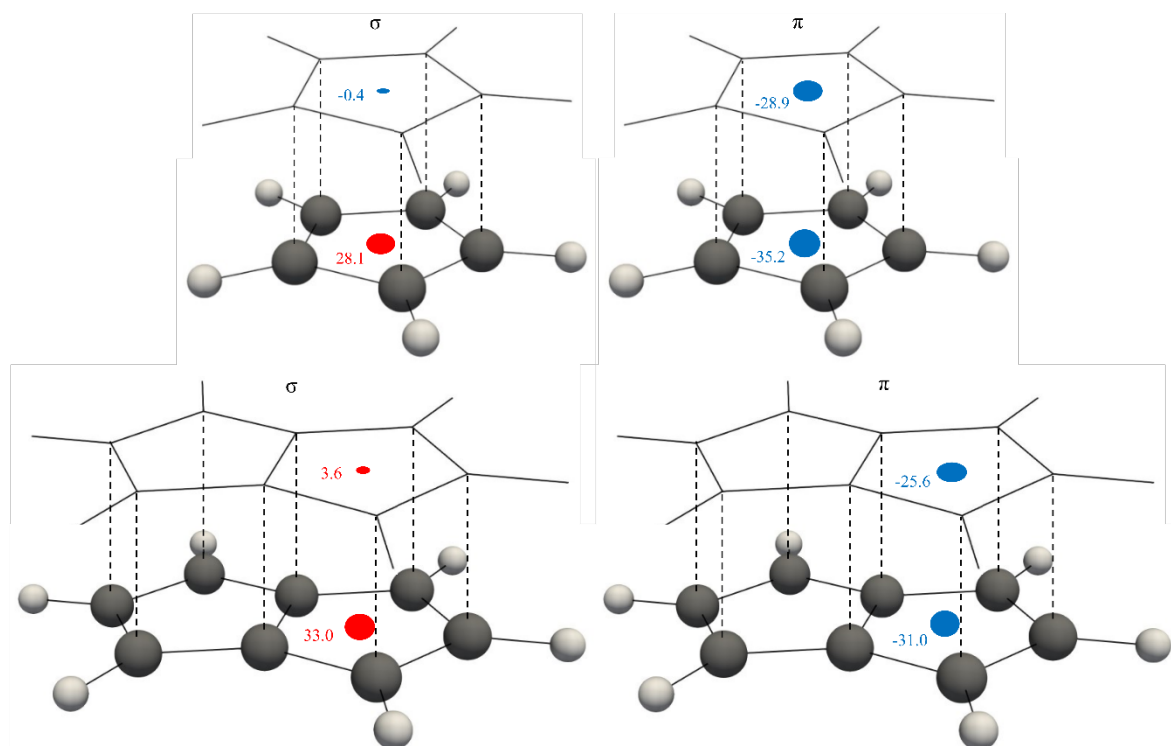

**Figure S8.** Computed values (in ppm) of  $\sigma$ - and  $\pi$ -components (left and right sides) of NICS<sub>zz</sub> at and above the ring centers (local and global) of both the cyclopentadienyl anion ( $C_5H_5^-$ ) and the pentalene dianion ( $C_8H_6^{2-}$ ) (at the GIAO-B3LYP/6-311+G\*\*// B3LYP/6-311+G\* level). The blue/red dots denote diatropic/paratropic character, and the dot size is in line with the NICS<sub>zz</sub> magnitude.
